# Supplementary material for: Polymorphism in the Promoter Region of NFE2L2 Gene Is a Genetic Marker of Susceptibility to Cirrhosis Associated with Alcohol Abuse
Source: PubMed Central journal article supplement (PMC6678089; doi:10.3390/ijms20143589), 2019-07-23
Supplement: ijms-20-03589-s001.pdf [file ijms-20-03589-s001.pdf]

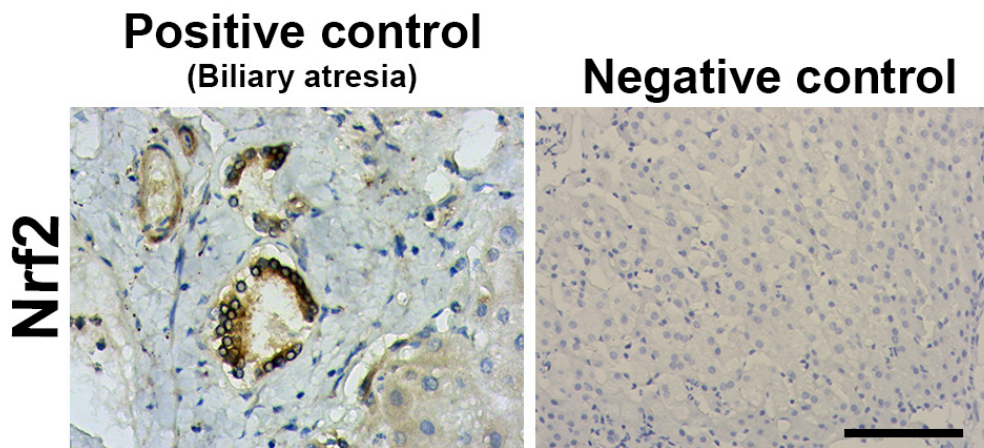

**Supplementary figure 1**

**SNP3565214**

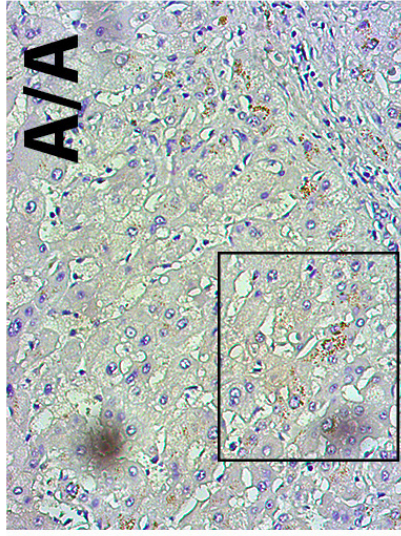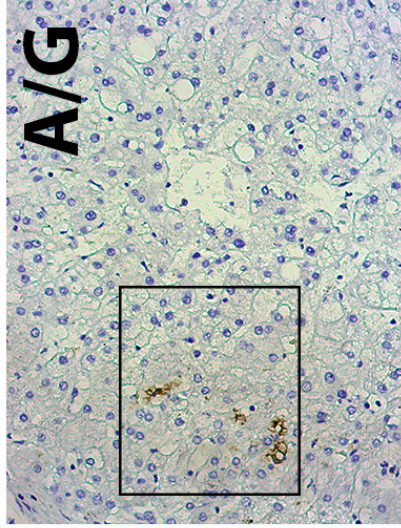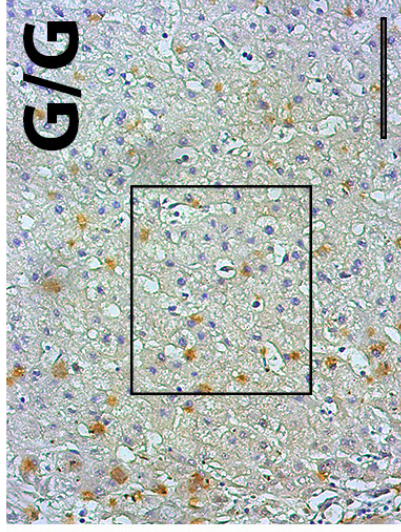

**ALD**

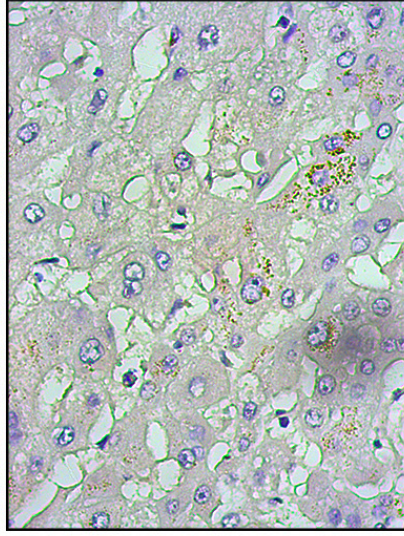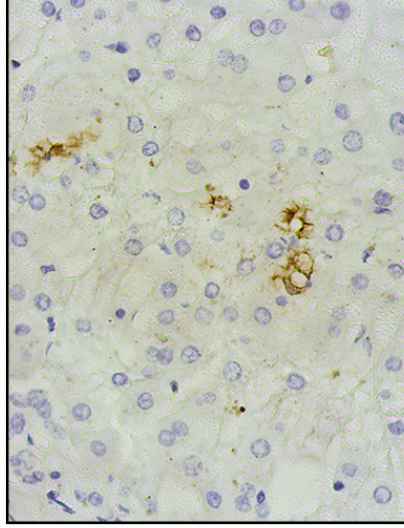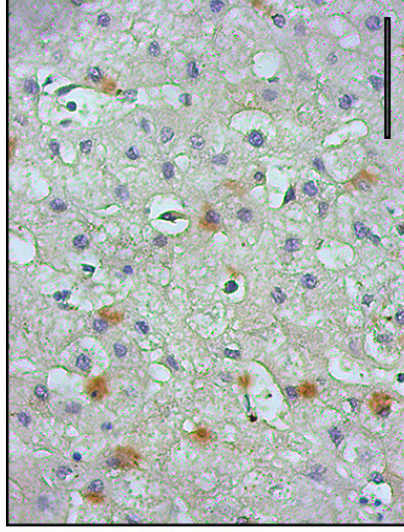

**SOD1**

**Supplementary figure 2**

# A SNP rs35652124

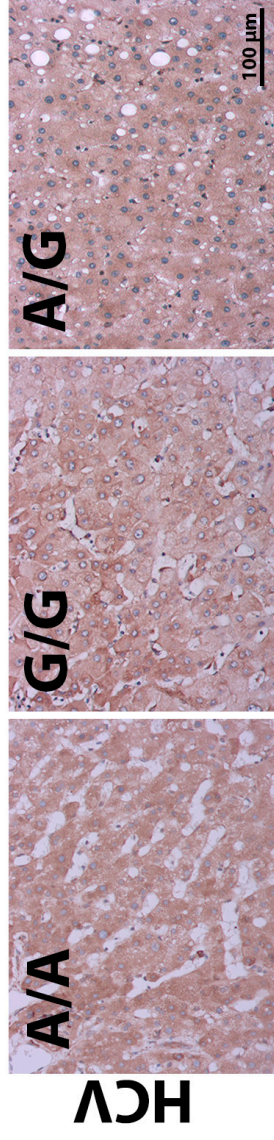

# B

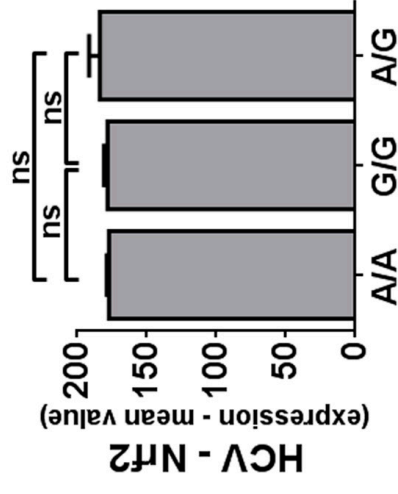

# C SNP rs4893819

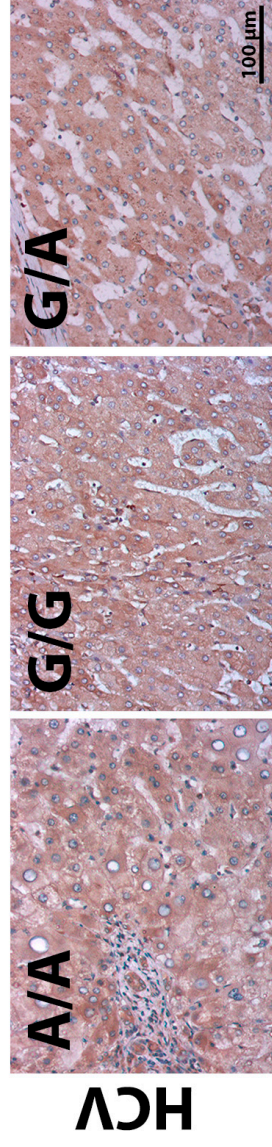

# D

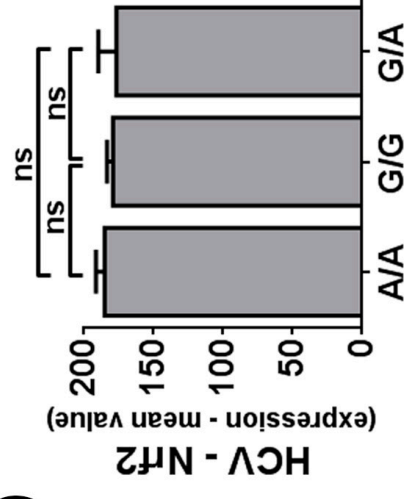

# E SNP rs6721961

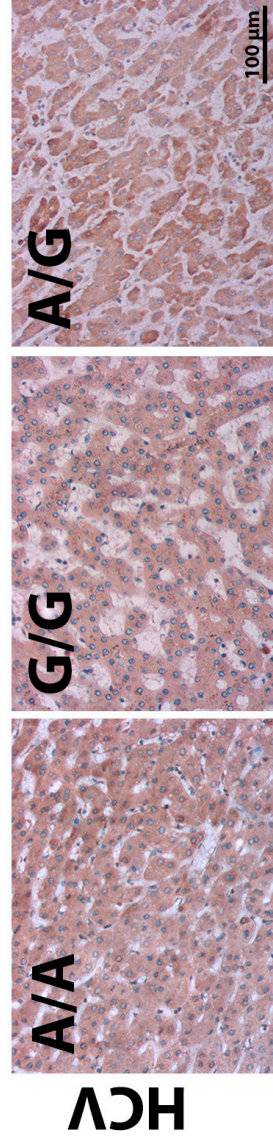

# F

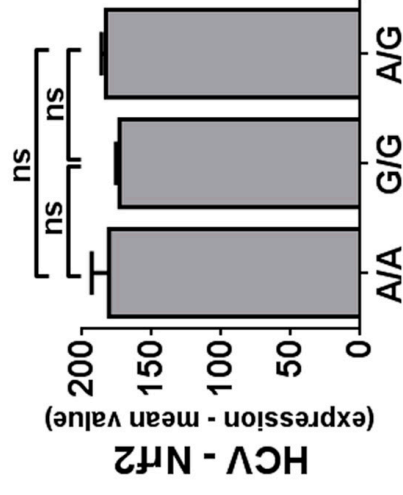

**Supplementary Table 1:** Clinical data of the groups

|                    | <b>ALD<br/>(49 patients)</b> | <b>HCV<br/>(18 patients)</b> | <b>Control<br/>(21 patients)</b> |
|--------------------|------------------------------|------------------------------|----------------------------------|
| <b>MALE (%)</b>    | 97,68                        | 81,25                        | 25                               |
| <b>FEMALE (%)</b>  | 2,32                         | 18,75                        | 75                               |
| <b>AGE (years)</b> | 53,62                        | 57,87                        | 49,5                             |
| <b>MELD</b>        | 16,51                        | 14,3                         | 7,75                             |
| <b>ALT (U/mL)</b>  | 41,26                        | 98,38                        | 20,5                             |
| <b>AST (U/mL)</b>  | 62,82                        | 106,39                       | 39,75                            |
| <b>GGT</b>         | 125,96                       | 134,3                        | 64,5                             |
| <b>TB (mg/dL)</b>  | 3,37                         | 3,28                         | 0,57                             |
| <b>DB (mg/dL)</b>  | 1,42                         | 1,47                         | 0,25                             |
| <b>IB (mg/dL)</b>  | 1,98                         | 1,81                         | 0,32                             |
| <b>ALD</b>         | 173,59                       | 156,91                       | 110,25                           |
| <b>LDH</b>         | 439,25                       | 476,62                       | -                                |
| <b>ALB</b>         | 3,2                          | 3,17                         | -                                |
| <b>INR</b>         | 1,67                         | 1,5                          | -                                |
| <b>UREA</b>        | 33,7                         | 23,9                         | 31,75                            |
| <b>CREATININE</b>  | 1,04                         | 0,77                         | 0,91                             |

**Supplementary Table 2:** allele frequencies compared to clinical data of Alcoholic liver disease (ALD)/hepatitis C virus (HCV) - SNP rs35652124 (-214 A > G)

|                   | ALD             | HCV           | <i>p</i> value | ALD             | HCV           | <i>p</i> value    | ALD              | HCV             | <i>p</i> value |
|-------------------|-----------------|---------------|----------------|-----------------|---------------|-------------------|------------------|-----------------|----------------|
|                   | A/A             | A/A           |                | G/G             | G/G           |                   | A/G              | A/G             |                |
| <b>MALE %</b>     | 94,45           | 100           | -              | 100             | 80            | -                 | 100              | 80              | -              |
| <b>FEMALE %</b>   | 5,55            | 0             | -              | 0               | 20            | -                 | 0                | 20              | -              |
| <b>AGE</b>        | 53,61 (2,057)   | 51 (0)        | 0,6844         | 55,25 (3,304)   | 60,4 (3,01)   | 0,3101            | 52,21 (2,924)    | 57,4 (4,007)    | 0,3568         |
| <b>MELD</b>       | 16,54 (1,101)   | 19,5 (4,5)    | 0,3706         | 16 (0,7559)     | 14 (0)        | 0,2199            | 17 (1,075)       | 12 (2,646)      | 0,0612         |
| <b>ALT</b>        | 46,25 (11,02)   | 73,5 (3,5)    | 0,3488         | 51,71 (4,46)    | 135,5 (0,5)   | <b>&lt;0,0001</b> | 30,47 (5,188)    | 75,5 (18,05)    | <b>0,0052</b>  |
| <b>AST</b>        | 76,92 (19,03)   | 151 (26,05)   | 0,1558         | 77,34 (13,1)    | 123 (14)      | 0,1277            | 39,94 (4,364)    | 82,75 (21,26)   | <b>0,0093</b>  |
| <b>GGT</b>        | 114,8 (21,65)   | 84,5 (7,8)    | 0,5917         | 212 (56,35)     | 85,5 (24,5)   | 0,2926            | 88,35 (27,72)    | 131 (46,69)     | 0,4427         |
| <b>TB</b>         | 3,272 (0,3964)  | 4,485 (3,285) | 0,4118         | 3,437 (0,5941)  | 3,25 (0,85)   | 0,8826            | 3,363 (0,5608)   | 2,88 (1,003)    | 0,6641         |
| <b>DB</b>         | 1,203 (0,2407)  | 2,665 (2,565) | 0,1717         | 1,681 (0,505)   | 1,1 (0,3)     | 0,5792            | 1,426 (0,4408)   | 0,9225 (0,1118) | 0,4516         |
| <b>IB</b>         | 2,051 (0,3092)  | 1,82 (0,72)   | 0,7818         | 1,794 (0,1932)  | 2,15 (0,55)   | 0,4520            | 2,049 (0,2102)   | 1,958 (0,9039)  | 0,8957         |
| <b>FALK</b>       | 214,2 (39,73)   | 226,2 (125,8) | 0,9153         | 191,3 (51,58)   | 102,5 (74,5)  | 0,4308            | 125,6 (16,44)    | 165,7 (52,37)   | 0,3413         |
| <b>LDH</b>        | 460,2 (48,82)   | 450,5 (231,5) | 0,9478         | 468,6 (57,1)    | 394,5 (191,5) | 0,6175            | 421 (46,45)      | 436,2 (125)     | 0,8892         |
| <b>ALB</b>        | 3,12 (0,1612)   | 3,01 (0,19)   | 0,8012         | 3,071 (0,1686)  | 2,9 (0,5)     | 0,6769            | 3,258 (0,1566)   | 3,25 (0,1708)   | 0,9773         |
| <b>INR</b>        | 1,682 (0,09848) | 2,23 (0,26)   | 0,0636         | 1,487 (0,08501) | 1,33 (0,08)   | 0,3872            | 1,824 (0,1526)   | 1,313 (0,1151)  | 0,0780         |
| <b>UREA</b>       | 27,77 (2,699)   | 18,5 (2,5)    | 0,2168         | 34,73 (4,387)   | 26,5 (1,5)    | 0,3727            | 38,05 (3,144)    | 26,25 (1,887)   | <b>0,0494</b>  |
| <b>CREATININE</b> | 1,048 (0,1839)  | 0,92 (0,05)   | 0,7960         | 0,9571 (0,1129) | 0,85 (0,05)   | 0,6453            | 0,9927 (0,06683) | 0,78 (0,07439)  | 0,1020         |

**Supplementary Table 3:** allele frequencies compared to clinical data of Alcoholic liver disease (ALD)/hepatitis C virus (HCV) - SNP rs4893819 (-1275 G > A)

|                   | ALD           | HCV           | <i>p</i> value | ALD            | HCV            | <i>p</i> value | ALD            | HCV           | <i>p</i> value |
|-------------------|---------------|---------------|----------------|----------------|----------------|----------------|----------------|---------------|----------------|
|                   | A/A           | A/A           |                | G/G            | G/G            |                | G/A            | G/A           |                |
| <b>MALE</b>       | 88,89         | 100           | -              | 100            | 100            | -              | 100            | 100           | -              |
| <b>FEMALE</b>     | 11.11         | 0             | -              | 0              | 0              | -              | 0              | 0             | -              |
| <b>AGE</b>        | 48,33 (2,809) | 60 (9)        | 0,1319         | 53 (2,282)     | 55 (2,91)      | 0,6416         | 59 (2,967)     | 63 (3)        | 0,5626         |
| <b>MELD</b>       | 16,67 (0,802) | 13,5 (1,5)    | 0,0996         | 16,71 (1,029)  | 12 (1,581)     | <b>0,0406</b>  | 16,86 (1,487)  | 15,5 (1,5)    | 0,6637         |
| <b>ALT</b>        | 46,2 (5,275)  | 25 (2)        | 0,0710         | 44,87 (8,916)  | 89,33 (12,33)  | <b>0,0500</b>  | 36 (10,75)     | 110 (26)      | <b>0,0187</b>  |
| <b>AST</b>        | 60,05 (11,8)  | 56,5 (13,5)   | 0,8796         | 70,73 (15,51)  | 112 (15,32)    | 0,2080         | 55,67 (15,92)  | 105,5 (31,5)  | 0,1777         |
| <b>GGT</b>        | 112,6 (39,07) | 187,5 (67,5)  | 0,3748         | 118,7 (20,65)  | 105,4 (13,39)  | 0,7525         | 180 (79,48)    | 47,5 (13,5)   | 0,3968         |
| <b>TB</b>         | 3,263 (0,439) | 2,125 (0,375) | 0,2148         | 3,249 (0,417)  | 2,13 (0,6742)  | 0,2132         | 3,71 (0,5114)  | 4,1 (1,7)     | 0,7625         |
| <b>DB</b>         | 1,305 (0,276) | 0,85 (0,15)   | 0,4060         | 1,205 (0,2856) | 0,7475 (0,266) | 0,4271         | 1,63 (0,4826)  | 1 (0,2)       | 0,4742         |
| <b>IB</b>         | 2,003 (0,260) | 1,275 (0,225) | 0,1860         | 2,038 (0,2483) | 1,383 (0,4633) | 0,2311         | 1,898 (0,3667) | 3,1 (1,5)     | 0,2846         |
| <b>FALK</b>       | 159,2 (23,81) | 227 (94)      | 0,3164         | 151,1 (18,09)  | 129,8 (17,59)  | 0,5698         | 268,3 (79,75)  | 64 (36)       | 0,2354         |
| <b>LDH</b>        | 421,4 (40,07) | 368,5 (199,5) | 0,6896         | 468,6 (47,46)  | 436,4 (110,4)  | 0,7648         | 443,6 (75,63)  | 419 (216)     | 0,8909         |
| <b>ALB</b>        | 3,017 (0,040) | 3,1 (0,1)     | 0,3758         | 3,107 (0,1493) | 3,15 (0,263)   | 0,8940         | 3,471 (0,2327) | 3,1 (0,3)     | 0,4596         |
| <b>INR</b>        | 1,56 (0,0898) | 1,51 (0,09)   | 0,7779         | 1,811 (0,1171) | 1,378 (0,2028) | 0,1017         | 1,553 (0,1647) | 1,385 (0,025) | 0,6199         |
| <b>UREA</b>       | 30,93 (3,372) | 20,5 (0,5)    | 0,1413         | 31,73 (3,067)  | 24 (2,799)     | 0,2298         | 35,71 (4,704)  | 28,5 (0,5)    | 0,4606         |
| <b>CREATININE</b> | 1,313 (0,374) | 0,65 (0,01)   | 0,3693         | 0,8513 (0,060) | 0,8875 (0,037) | 0,7695         | 1,083 (0,0953) | 0,75 (0,05)   | 0,1207         |

**Supplementary Table 4:** allele frequencies compared to clinical data of Alcoholic liver disease (ALD)/hepatitis C virus (HCV) - SNP rs6721961(-178 A > G)

|                   | ALD            | HCV            | <i>p</i> value | ALD            | HCV            | <i>p</i> value | ALD            | HCV            | <i>p</i> value |
|-------------------|----------------|----------------|----------------|----------------|----------------|----------------|----------------|----------------|----------------|
|                   | A/A            | A/A            |                | G/G            | G/G            |                | A/G            | A/G            |                |
| <b>MALE</b>       | 90             | 66,66          | -              | 100            | 100            | -              | 100            | 87,5           | -              |
| <b>FEMALE</b>     | 10             | 33,33          | -              | 0              | 0              | -              | 0              | 12,5           | -              |
| <b>AGE</b>        | 56,5 (3,212)   | 60,67 (1,202)  | 0,3493         | 49,71 (1,957)  | 40,33 (7,446)  | 0,1039         | 57,14 (2,344)  | 57,5 (2,86)    | 0,9257         |
| <b>MELD</b>       | 16,63 (1,101)  | 13 (2,121)     | 0,1208         | 15 (0,7977)    | 11 (2,517)     | 0,0632         | 17,36 (1,002)  | 15,4 (2,731)   | 0,4122         |
| <b>ALT</b>        | 39,5 (7,058)   | 110,9 (35,16)  | <b>0,0196</b>  | 40,18 (5,564)  | 15 (1)         | 0,0993         | 43,73 (11,83)  | 88,4 (12,11)   | <b>0,0382</b>  |
| <b>AST</b>        | 72,75 (10,37)  | 92 (18,91)     | 0,3508         | 58,94 (8,13)   | 54 (27,62)     | 0,8146         | 59,85 (21,59)  | 117,4 (19,7)   | 0,1228         |
| <b>GGT</b>        | 158,7 (60,2)   | 108,8 (21,86)  | 0,5622         | 115,7 (21,53)  | 77 (16,5)      | 0,4047         | 120,5 (33,98)  | 159,6 (94,09)  | 0,6300         |
| <b>TB</b>         | 3,648 (0,3599) | 2,645 (0,6874) | 0,1804         | 2,632 (0,3742) | 1,74 (1,18)    | 0,3497         | 3,745 (0,5585) | 3,64 (1,342)   | 0,9317         |
| <b>DB</b>         | 1,631 (0,3632) | 1,325 (0,6295) | 0,6585         | 0,934 (0,1771) | 0,586 (0,4093) | 0,3902         | 1,698 (0,4554) | 1,608 (0,9225) | 0,9225         |
| <b>IB</b>         | 2,039 (0,3692) | 1,32 (0,3656)  | 0,2358         | 1,871 (0,2752) | 1,153 (0,7764) | 0,2868         | 1,929 (0,181)  | 2,032 (0,7362) | 0,8579         |
| <b>FALK</b>       | 267,6 (68,49)  | 173,4 (31,02)  | 0,3748         | 146,1 (16,06)  | 130,3 (26,57)  | 0,6604         | 126,5 (19,45)  | 139,7 (55,29)  | 0,7789         |
| <b>LDH</b>        | 381,4 (58,18)  | 547,2 (135,2)  | 0,2128         | 471 (49,53)    | 585,5 (0,5)    | 0,3622         | 470,8 (47,57)  | 412,4 (102,8)  | 0,5645         |
| <b>ALB</b>        | 3,308 (0,184)  | 3,25 (0,1555)  | 0,8448         | 3,075 (0,1274) | 2,35 (0,05)    | <b>0,0445</b>  | 3,185 (0,198)  | 3,264 (0,2381) | 0,8187         |
| <b>INR</b>        | 1,505 (0,1257) | 1,383 (0,1684) | 0,5802         | 1,706 (0,107)  | 1,245 (0,005)  | 0,1148         | 1,685 (0,1344) | 1,66 (0,2535)  | 0,9236         |
| <b>UREA</b>       | 37 (4,687)     | 22,25 (3,945)  | 0,0706         | 32,04 (3,942)  | 35,33 (8,413)  | 0,7177         | 34,19 (2,451)  | 25 (2,811)     | <b>0,0428</b>  |
| <b>CREATININE</b> | 1,326 (0,2696) | 0,67 (0,1338)  | 0,1326         | 0,8442 (0,051) | 1,047 (0,5133) | 0,4299         | 0,9727 (0,086) | 0,842 (0,0446) | 0,3436         |
